# Supplementary material
Source: Springer Nature journal article supplement (https://www.springermedizin.de/resource/supplementary/12888_2005_154_MOESM3_ESM.pdf/9482016)

**I. a**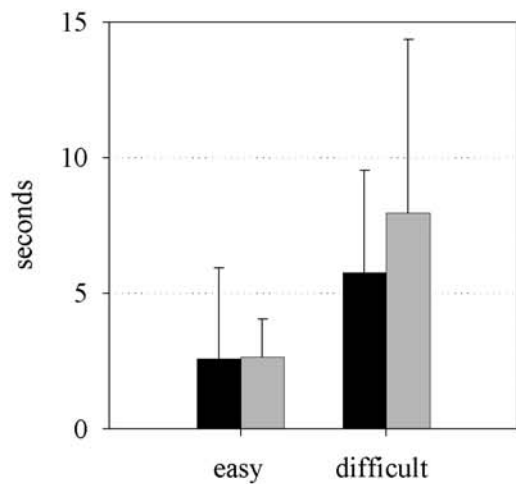**I. b**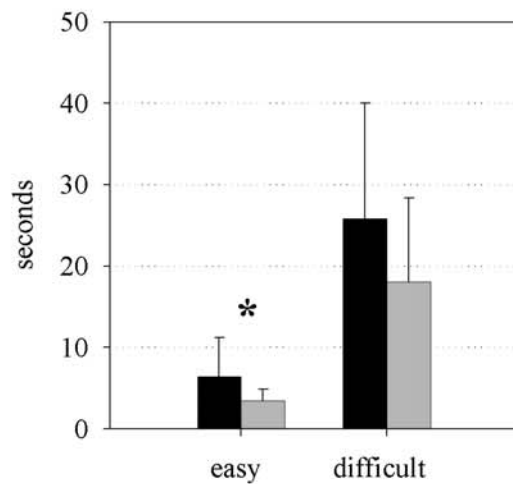**I. c**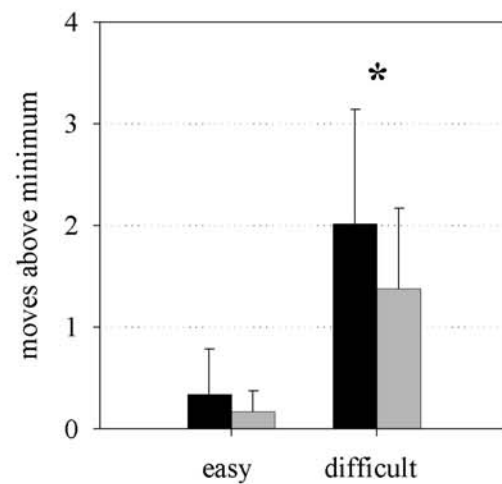**II. a**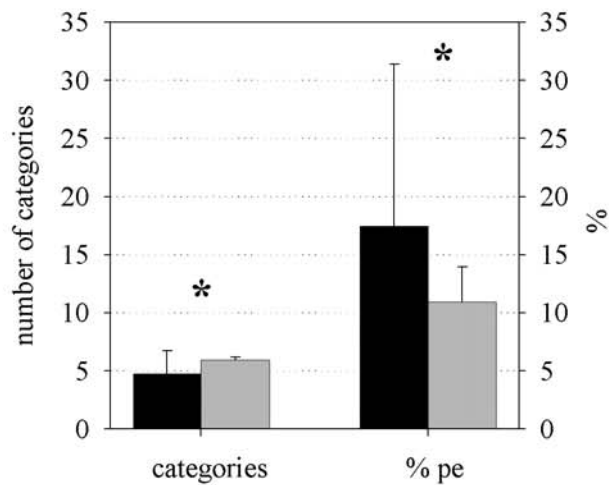**II. b**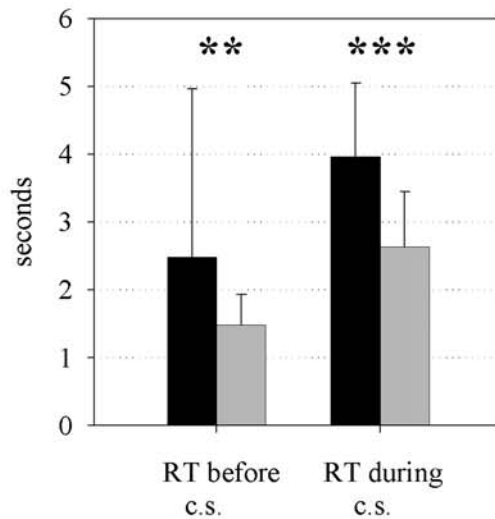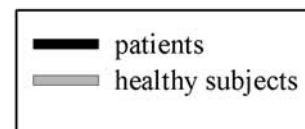

Supplement: MOESM3 [file 9482016]
